# Supplementary material for: Structural framework and timing of the Pahtohavare Cu ± Au deposits, Kiruna mining district, Sweden
Source: Copernicus journal article supplement (doi:10.5194/se-14-763-2023), 2023-07-18
Supplement: Supplementary file 1 [file se-14-763-2023-supplement.zip]

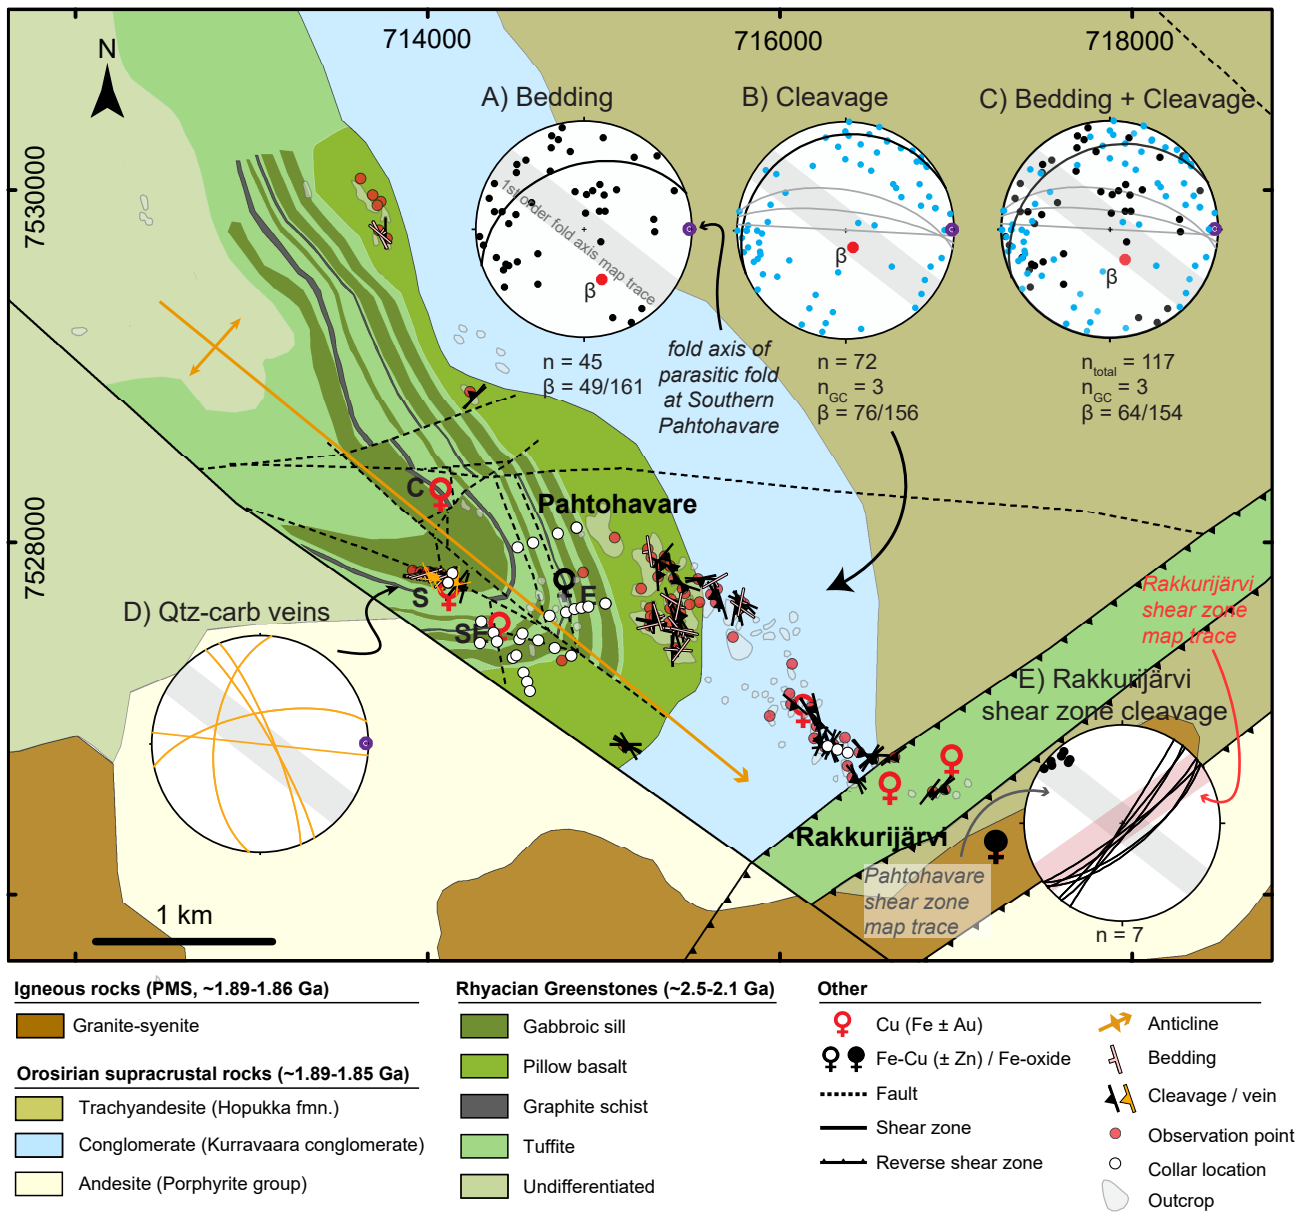

**S1. Geologic map showing all bedding and cleavage measurement localities, observation points, outcrop exposure, and collar locations of the drill holes used in the 3D model (Fig. 7) in the Pahtohavare-Rakkurijärvi area. Outcrop data from SGU.**
