# Supplementary material for: Structural framework and timing of the Pahtohavare Cu ± Au deposits, Kiruna mining district, Sweden
Source: Copernicus journal article supplement (doi:10.5194/se-14-763-2023), 2023-07-18
Supplement: Supplementary file 3 [file se-14-763-2023-supplement.zip]

**S4. Interactive 3D model of the southern Kiruna mining district (presented in Fig. 7), including faults, shear zones (partly covered by lithologies), and lithological boundaries (with 40% transparency).**
