# Supplementary material for: Structural framework and timing of the Pahtohavare Cu ± Au deposits, Kiruna mining district, Sweden
Source: Copernicus journal article supplement (doi:10.5194/se-14-763-2023), 2023-07-18
Supplement: Supplementary file 5 [file se-14-763-2023-supplement.zip]

Archive with 7 entries (7 files):
- S4_Caption.pdf
- Table S1.pdf
- S4.glb
- se-14-763-2023-supplement-title-page.pdf
- S3.pdf
- S2.pdf
- S1.pdf
