# Supplementary material for: Structural framework and timing of the Pahtohavare Cu ± Au deposits, Kiruna mining district, Sweden
Source: Copernicus journal article supplement (doi:10.5194/se-14-763-2023), 2023-07-18
Supplement: Supplementary file 5 [file se-14-763-2023-supplement.zip › se-14-763-2023-supplement-title-page.pdf]

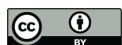

## *Supplement of*

# **Structural framework and timing of the Pahtohavare Cu ± Au deposits, Kiruna mining district, Sweden**

**Leslie Logan et al.**

*Correspondence to:* Leslie Logan (leslie.logan@ltu.se)

- se-14-763-2023-supplement-title-page.pdf
- S1.pdf
- S2.pdf
- S3.pdf
- S4.glb
- S4\_Caption.pdf
- Table S1.pdf

The copyright of individual parts of the supplement might differ from the article licence.
