# Supplementary material for: Structural framework and timing of the Pahtohavare Cu ± Au deposits, Kiruna mining district, Sweden
Source: Copernicus journal article supplement (doi:10.5194/se-14-763-2023), 2023-07-18
Supplement: Supplementary file 5 [file se-14-763-2023-supplement.zip › Table S1.pdf]

Table S1. Legend for drill hole collar locations used in 3D model (Fig. 7).

| Collar color                                                                        | Drill hole ID | North (X)  | East (Y)  | Depth  |
|-------------------------------------------------------------------------------------|---------------|------------|-----------|--------|
| 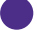   | RKJ70001      | 7526796.02 | 716385.19 | 126.27 |
| 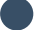   | RKJ70004      | 7526833.63 | 716271.22 | 146.79 |
| 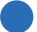   | RKJ70006      | 7526814.80 | 716328.15 | 137.17 |
| 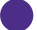   | PAH85005      | 7528074.90 | 714846.86 | 185.49 |
| 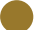   | PAH85002      | 7528041.49 | 714740.81 | 199.37 |
| 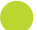   | PAH85003      | 7527988.80 | 714599.75 | 158.06 |
| 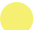   | PAH85004      | 7527962.86 | 714511.30 | 52.64  |
| 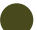   | PAH85006      | 7528074.85 | 714846.86 | 253.00 |
| 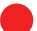   | PAH84001      | 7527592.77 | 714787.57 | 196.73 |
| 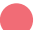   | PAH84002      | 7527611.71 | 714835.58 | 166.84 |
| 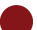   | PAH84003      | 7527619.13 | 714875.10 | 214.45 |
| 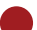   | PAH84004      | 7527626.54 | 714914.63 | 288.14 |
| 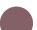  | PAH85014      | 7527643.41 | 715011.05 | 304.25 |
| 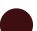 | PAH85105      | 7527574.17 | 714692.57 | 58.46  |
| 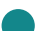 | PAH88097      | 7527761.32 | 714118.95 | 101.20 |
| 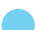 | PAH88219      | 7527816.92 | 714144.00 | 159.80 |
| 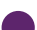 | PAH85114      | 7527474.86 | 714538.16 | 192.71 |
| 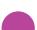 | PAH85113      | 7527434.21 | 714628.41 | 277.83 |
| 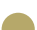 | PAH85112      | 7527391.50 | 714723.2  | 371.04 |
| 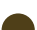 | PAH85111      | 7527347.79 | 714815.36 | 272.20 |
| 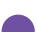 | PAH85117      | 7527348.74 | 714506.57 | 329.94 |
| 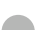 | PAH85116      | 7527251.00 | 714545.86 | 443.34 |
| 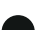 | PAH86101      | 7527199.42 | 714565.40 | 441.95 |
| 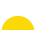 | PAH85120      | 7527146.08 | 714581.91 | 472.41 |
| 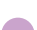 | PAH88039      | 7527440.77 | 714523.24 | 135.00 |
| 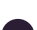 | PAH88078      | 7527335.35 | 714485.18 | 154.94 |
| 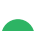 | PAH88044      | 7527478.21 | 714377.39 | 79.25  |
| 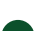 | PAH88057      | 7527428.79 | 714394.60 | 151.45 |
| 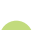 | PAH88062      | 7527541.52 | 714305.03 | 45.40  |
| 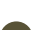 | PAH85115      | 7527420.45 | 714298.73 | 241.99 |
| 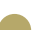 | PAH85012      | 7527643.41 | 715011.05 | 267.47 |
