# Supplementary figures and images for: Structural framework and timing of the Pahtohavare Cu ± Au deposits, Kiruna mining district, Sweden
Source: Copernicus journal article supplement (doi:10.5194/se-14-763-2023), 2023-07-18

S3. Reflected light full thin section micrograph of a parasitic fold taken from drill core.

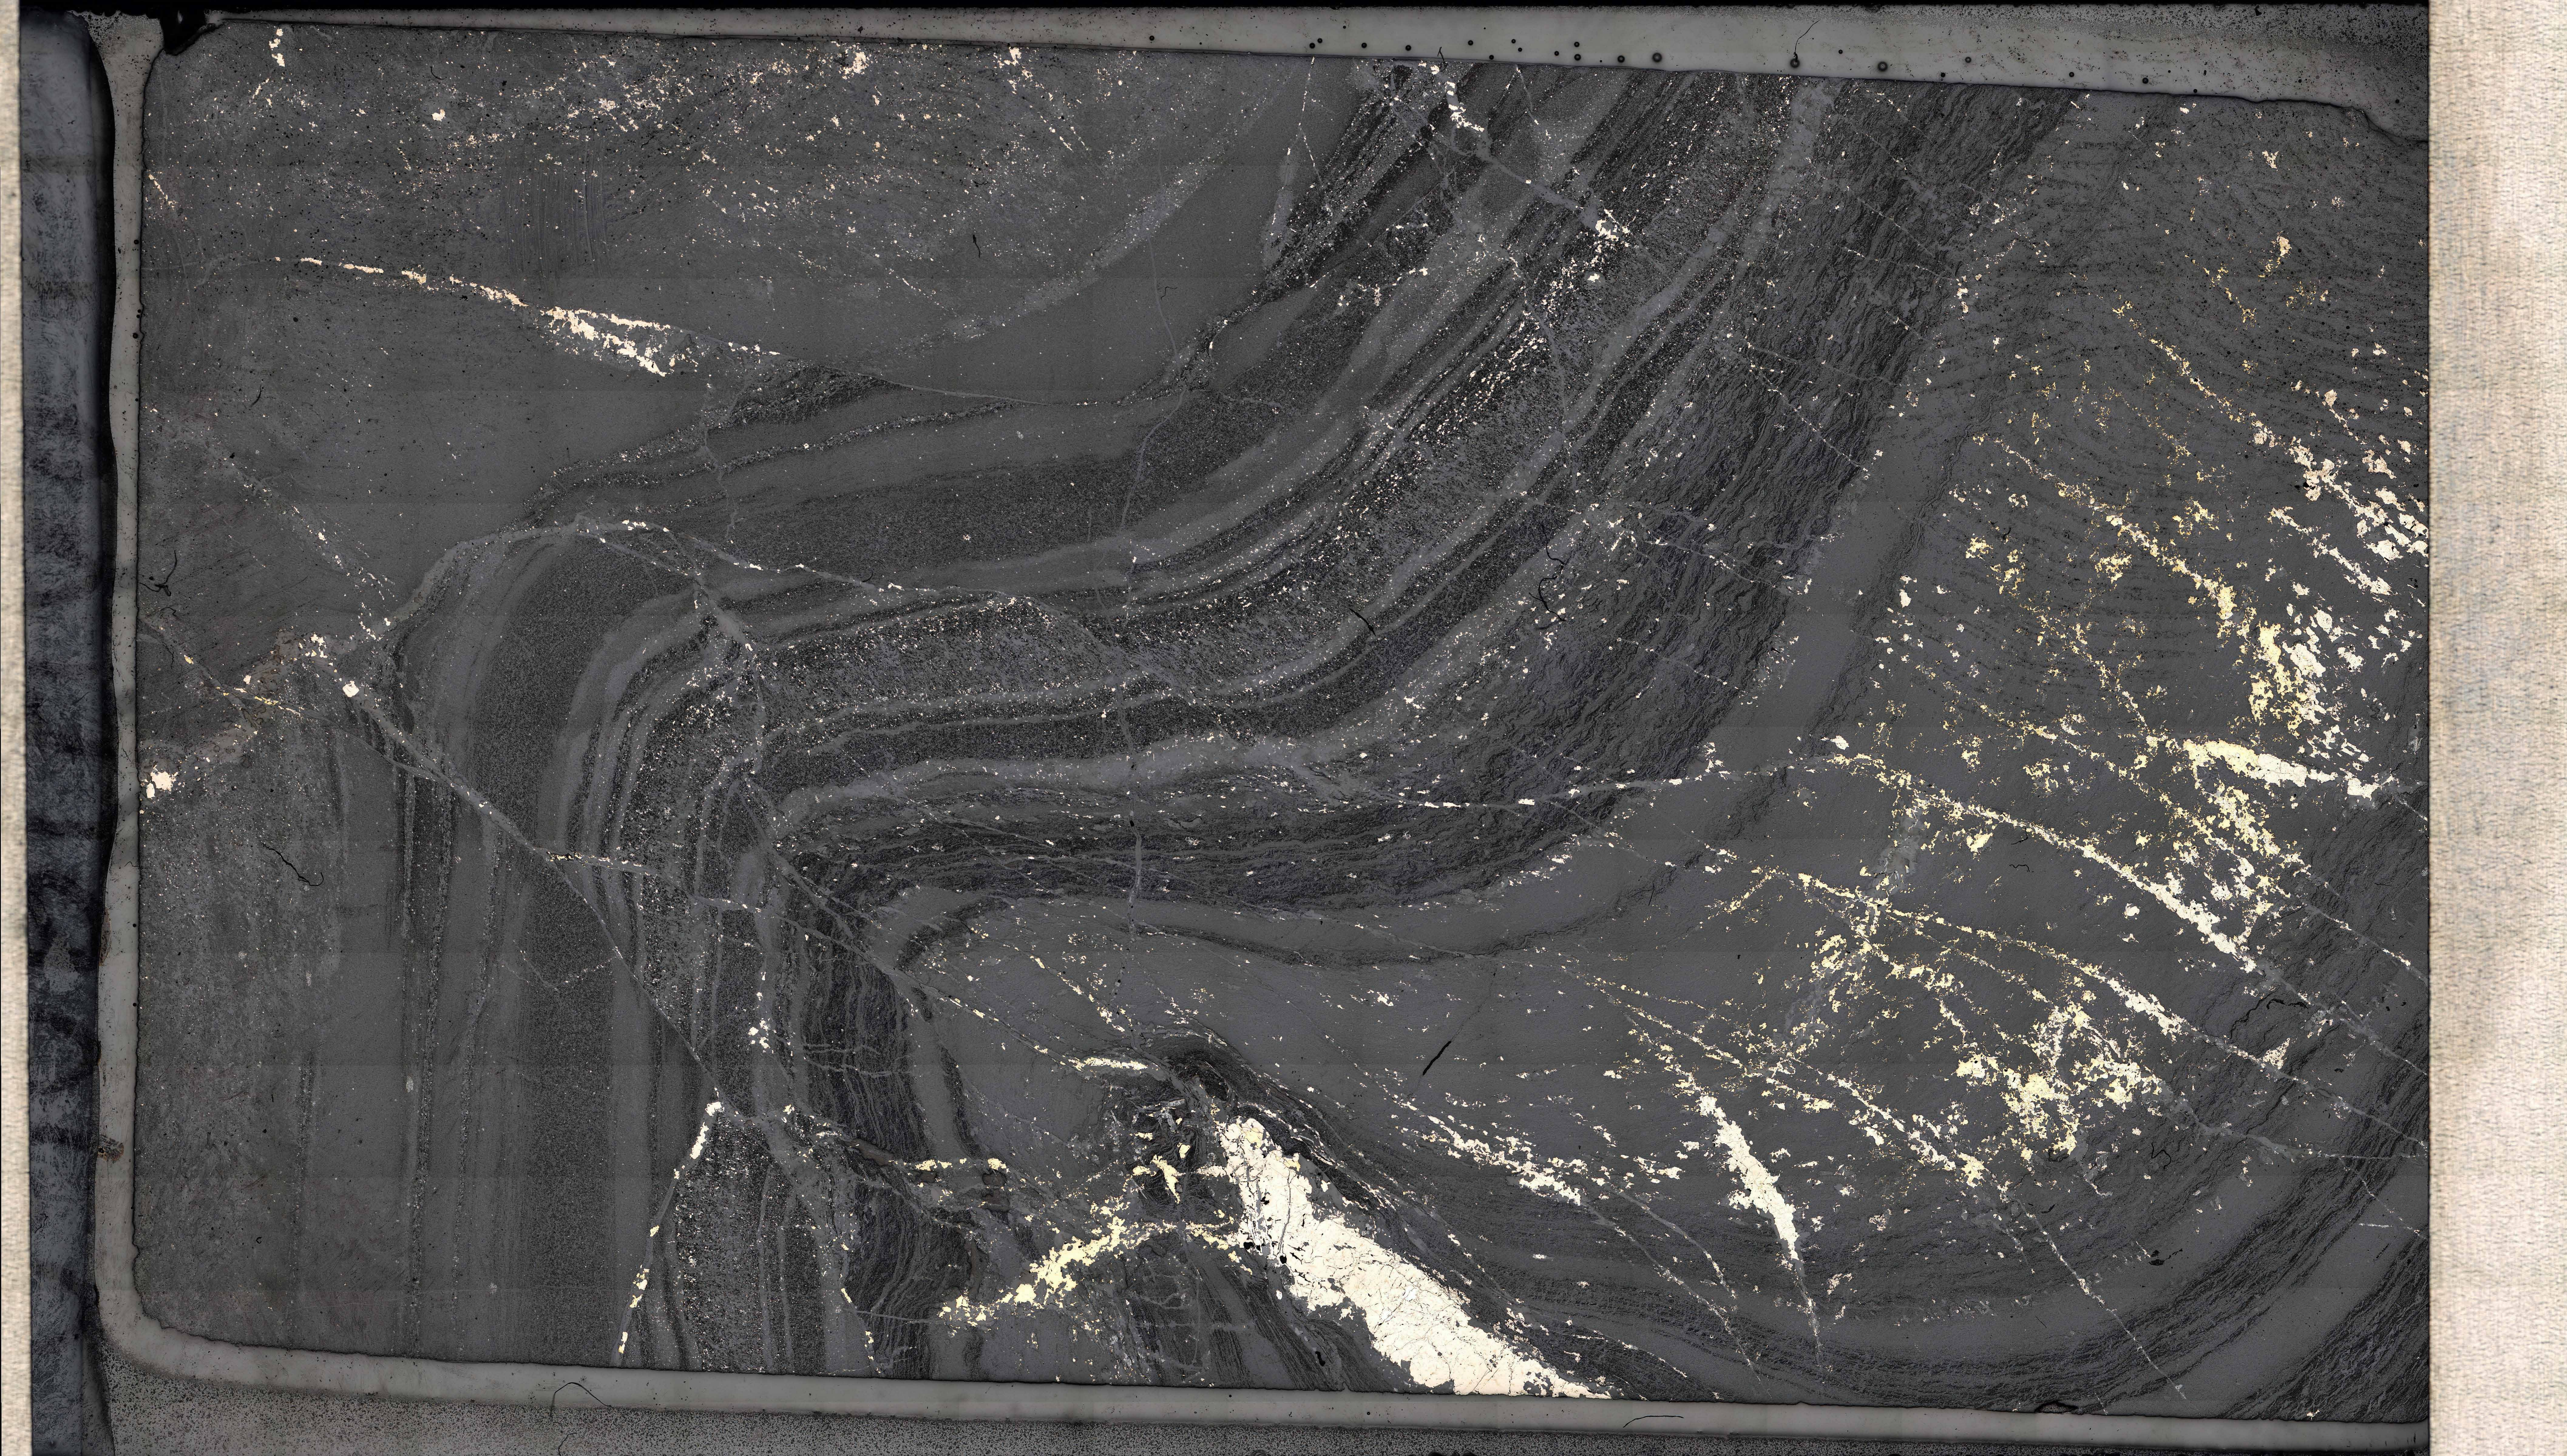

Supplement: Supplementary file 2 [file se-14-763-2023-supplement.zip]

S2. Plane polarized light full thin section micrograph of a parasitic fold taken from drill core.

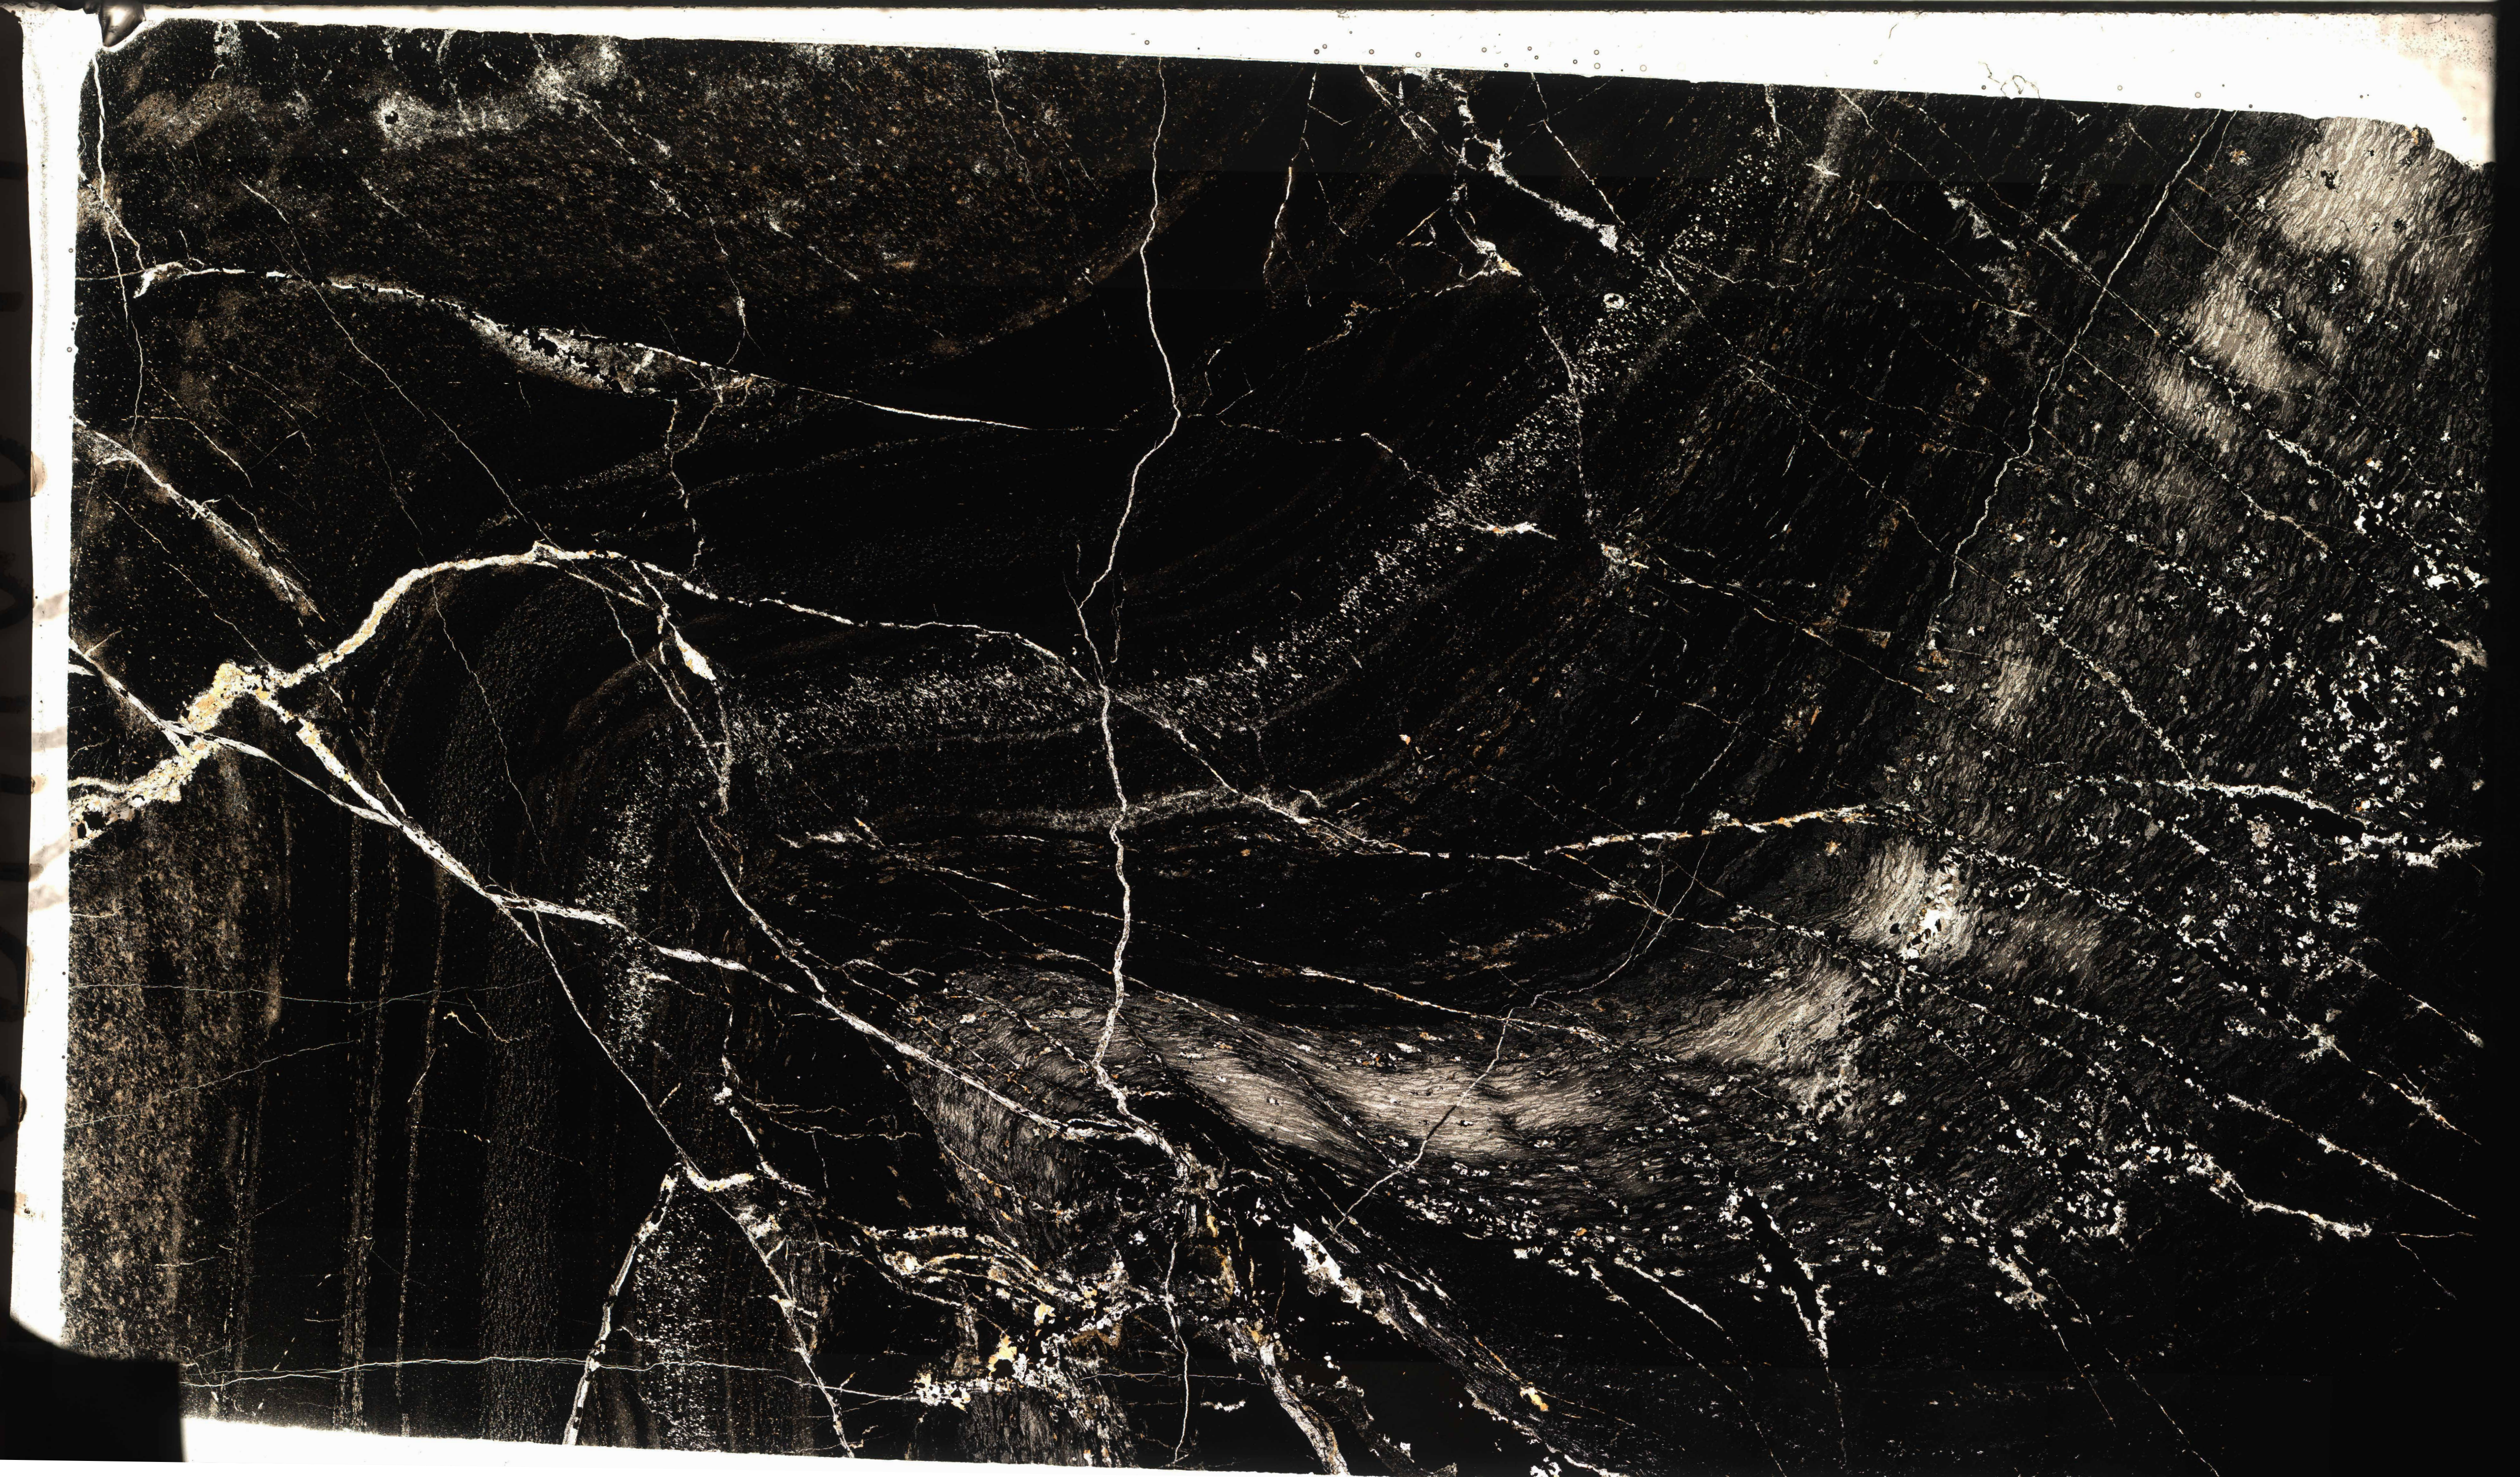

Supplement: Supplementary file 4 [file se-14-763-2023-supplement.zip]
